# Supplementary material for: Clinical Characteristics of Asymptomatic and Symptomatic Pediatric Coronavirus Disease 2019 (COVID-19): A Systematic Review
Source: PubMed Central journal article supplement (PMC7558873; doi:10.3390/medicina56090474), 2020-09-15
Supplement: medicina-56-00474-s001.pdf [file medicina-56-00474-s001.pdf]

## Online-Only Supplement

### Clinical Characteristics of Asymptomatic and Symptomatic Pediatric Coronavirus Disease 2019 (COVID-19): A Systematic Review

Table S1. Summary profiles of asymptomatic patients.

Table S2. Summary profiles of symptomatic patients.

References

**Table S1. Summary profiles of asymptomatic patients.**

| Author (year)          | Age / Sex | Country | Presenting symptoms | Lab findings |                         |         |           | Image findings                                                                                                                                                  | Remarkable past history | ICU admission | ARDS | Treatment                                                                                       | Outcome                                                        | Survival |
|------------------------|-----------|---------|---------------------|--------------|-------------------------|---------|-----------|-----------------------------------------------------------------------------------------------------------------------------------------------------------------|-------------------------|---------------|------|-------------------------------------------------------------------------------------------------|----------------------------------------------------------------|----------|
|                        |           |         |                     | Others       | CBC                     | CRP     | Chemistry |                                                                                                                                                                 |                         |               |      |                                                                                                 |                                                                |          |
| 1. Li et al. (2020)[1] | 1Y5       |         | -                   |              |                         | 9.4mg/L |           | Four days after admission, patchy ground-glass opacification of the right upper lobe. Five days subsequently, during antiviral treatment, normalized.           |                         | Yes           |      | Antiviral, anti-infective therapy, immunoglobulin therapy, interferon, Lianhua qingwen granules | Remain in hospital for observation; 24 days at time of writing | Alive    |
|                        | 10        |         | -                   |              | WBC                     |         |           | Not performed.                                                                                                                                                  |                         | Yes           |      | Montelukast Na chewable tablets, immunoglobulin therapy                                         | Discharged home                                                | Alive    |
|                        | M/F       |         |                     |              | 14.8*10 <sup>9</sup> /L |         |           |                                                                                                                                                                 |                         |               |      |                                                                                                 |                                                                |          |
|                        | 4Y/M      |         | -                   |              |                         |         |           | Two days after admission, patchy ground-glass opacification of the left lower lobe. Five days subsequently, during symptomatic and supportive care, normalized. |                         | Yes           |      | Montelukast Na chewable tablets, immunoglobulin therapy                                         | Discharged home                                                | Alive    |
|                        | 6Y/M      |         | -                   |              |                         |         |           | Not performed.                                                                                                                                                  |                         | ?             |      | Interferon, Montelukast Na chewable tablets, immunoglobulin therapy                             | Remain in hospital for observation; 13 days at time of writing | Alive    |
| 2. Wang et al.         | 36h /M    | China   | -                   |              |                         |         |           | CT: high-density nodular shadow under                                                                                                                           | -                       | -             | -    | No special treatment was                                                                        | Discharged                                                     | Alive    |

|                          |         |                       |   |                                             |                                                                        |               |                                                                         |                                                   |    |    |                         |          |       |
|--------------------------|---------|-----------------------|---|---------------------------------------------|------------------------------------------------------------------------|---------------|-------------------------------------------------------------------------|---------------------------------------------------|----|----|-------------------------|----------|-------|
| (2020)[2]                |         |                       |   |                                             |                                                                        |               | the pleura of the posterior segment of the upper lobe of the right lung |                                                   |    |    | given                   |          |       |
| 3. Cao et al. (2020)[3]  | 17d /M  | China                 | - | -                                           |                                                                        |               |                                                                         |                                                   |    |    |                         |          |       |
| 4. Xu et al. (2020)[4]   | 13Y /M  | China                 | - | Decreased leukocytes, decreased neutrophils |                                                                        |               |                                                                         |                                                   |    |    | A-interferon oral spray |          | Alive |
| 5. Ma et al. (2020)[5]   | 3Y/ M   | China                 | - |                                             |                                                                        |               |                                                                         |                                                   |    |    |                         | Improved | Alive |
|                          | 2Y/ F   | China                 | - |                                             |                                                                        |               |                                                                         |                                                   |    |    |                         | Improved | Alive |
|                          | 11 M/ M | China                 | - |                                             |                                                                        |               |                                                                         |                                                   |    |    |                         | Improved | Alive |
|                          | 9Y/ F   | China                 | - |                                             |                                                                        |               |                                                                         |                                                   |    |    |                         | Improved | Alive |
| 6. Zeng et al. (2020)[6] | 2d/ M   | China                 | - | Leukocytosis, thrombocytopenia              | <i>Enterobacter</i> agglomerate s-positive blood culture, coagulopathy | CT: pneumonia |                                                                         | Neonatal respiratory distress syndrome, pneumonia |    |    |                         | Negative | Alive |
| 7. Wei et al. (2020)[7]  | 8M/ F   | China                 | - |                                             |                                                                        |               |                                                                         |                                                   |    |    | No                      |          |       |
| 8. See et al. (2020)[8]  | 9Y/ M   | Malaysia (from china) | - |                                             |                                                                        |               | X-ray: Rt perihilar opacities                                           | None                                              | No | No | None                    |          | Alive |



|                                   |        |           |   |                                                                 |                                 |                                     |                                        |      |    |    |                 |          |       |  |
|-----------------------------------|--------|-----------|---|-----------------------------------------------------------------|---------------------------------|-------------------------------------|----------------------------------------|------|----|----|-----------------|----------|-------|--|
| <b>13. Hu et al. (2020)[13]</b>   | 10Y /F | China     | - | Normal                                                          | -                               |                                     | CT typical ground-glass/patchy shadows |      |    |    |                 |          |       |  |
|                                   | 5Y/M   | China     | - | Abnormal lymphocyte                                             | Abnormal procalcitonin, D-dimer |                                     | -                                      |      |    |    |                 |          |       |  |
|                                   | 8Y/F   | China     | - |                                                                 | Abnormal procalcitonin level    |                                     | -                                      |      |    |    |                 |          |       |  |
|                                   | 14Y /F | China     | - | -                                                               | -                               |                                     | -                                      |      |    |    |                 |          |       |  |
|                                   | 6Y/M   | China     | - | Abnormal lymphocyte                                             | Abnormal LDH, ALT               |                                     | -                                      |      |    |    |                 |          |       |  |
|                                   | 15Y /M | China     | - |                                                                 | Abnormal ALT                    |                                     | CT typical ground-glass/patchy shadows |      |    |    |                 |          |       |  |
| <b>14. Chan et al. (2020)[14]</b> | 10Y /M | China     | - |                                                                 | Elevated alkaline phosphatase   |                                     | CT ground glass                        | None | No | No | Supportive care | Stable   | Alive |  |
| <b>15. Kam et al. (2020)[15]</b>  | 6M/M   | Singapore | - | Neutropenia d8 (absolute neutrophil count $0.9 \times 10^9/L$ ) | -                               | Persistent positive PCR for 16 days | Not performed                          | -    | No | No | None            | Improved | Alive |  |
| <b>16. Tang et al. (2020)[16]</b> | 10Y /M |           | - | Normal                                                          | Normal                          |                                     | -                                      |      |    |    |                 |          |       |  |
|                                   | 10Y /M | China     |   |                                                                 |                                 |                                     |                                        |      |    |    |                 | Resolved | Alive |  |
| <b>17. Qian et al. (2020)[17]</b> | 1Y/F   |           | - | -                                                               | -                               |                                     | -                                      |      |    |    |                 |          |       |  |
| <b>18. Lu et</b>                  | -/F    |           | - | Normal                                                          | Normal                          |                                     | Ground glass and                       |      |    |    |                 |          |       |  |

|                                                                                |           |   |                  |                     |                                          |
|--------------------------------------------------------------------------------|-----------|---|------------------|---------------------|------------------------------------------|
| <b>al.</b><br><b>(2020)[18]</b><br><b>]</b>                                    |           |   |                  |                     | patchy opacities in<br>both lungs        |
|                                                                                | -/M       | - | Normal           | Normal              | -                                        |
| <b>19. Pan</b><br><b>et al.</b><br><b>(2020)[19]</b><br><b>]</b>               | 3Y/<br>M  | - | Normal           | Normal              | -                                        |
| <b>20. Tong</b><br><b>et al.</b><br><b>(2020)[20]</b><br><b>]</b>              | 12Y<br>/M | - | -                | -                   | -                                        |
| <b>21.</b><br><b>Gautret</b><br><b>et al.</b><br><b>(2020)[21]</b><br><b>]</b> | 10Y<br>/M | - | -                | -                   | -                                        |
|                                                                                | 12Y<br>/F | - | -                | -                   | -                                        |
|                                                                                | 14Y<br>/F | - | -                | -                   | -                                        |
|                                                                                | 10Y<br>/M | - | -                | -                   | -                                        |
| <b>22. Su et</b><br><b>al.</b><br><b>(2020)[22]</b><br><b>]</b>                | 2Y/<br>F  | - | -                | Increased CK-<br>MB | -                                        |
|                                                                                | 3Y/<br>F  | - | Thrombop<br>enia | Increased CK-<br>MB | Pneumonia                                |
|                                                                                | 5Y/<br>F  | - | -                | Increased CK-<br>MB | -                                        |
|                                                                                | 1Y/<br>M  | - | -                | Increased CK-<br>MB | Ground glass opacities,<br>consolidation |
|                                                                                | 1Y/<br>M  | - | -                | Increased CK-<br>MB | -                                        |
|                                                                                | 9Y/<br>F  | - | -                | -                   | Bronchitis                               |

|                           |           |       |        |        |                                   |        |                                          |    |            |            |       |  |
|---------------------------|-----------|-------|--------|--------|-----------------------------------|--------|------------------------------------------|----|------------|------------|-------|--|
| 23. Yao et al. (2020)[23] | 4Y/<br>M  | -     | Normal | Normal | -                                 |        |                                          |    |            |            |       |  |
|                           | 1Y/<br>F  | -     | Normal | Normal | -                                 |        |                                          |    |            |            |       |  |
| 24. Lan et al. (2020)[24] | 7Y/<br>M  | China | Normal | Normal | Normal                            | Normal | No                                       | No | Discharged | Alive      |       |  |
|                           | 7Y/<br>F  | China | Normal | Normal | High ALT (520),<br>high AST (439) | Normal | Ground glass opacities,<br>consolidation | No | No         | Discharged | Alive |  |
|                           | 12Y/<br>F | China | Normal | Normal |                                   | Normal | Ground glass opacities                   | No | No         | Discharged | Alive |  |
|                           | 13Y/<br>M | China | Normal | Normal |                                   | Normal | Ground glass opacities                   | No | No         | Discharged | Alive |  |

\*Sun et al. (2020). Treatment in () means other treatments.

†Lou et al. did state that two of the three patients presented nasal congestion and rhinitis, but did not specify which.

Abbreviation: ALT(alanine transferase), ARDS(acute respiratory distress syndrome), AST(aspartate transferase), CBC(complete blood count), CK(creatine kinase), CK-MB(creatine kinase-myocardial band), Cr(creatinine), CRP(C-reactive protein), EEG(electroencephalography), ESR(Erythrocyte sedimentation ratio), GI(gastrointestinal), Hb(hemoglobin), ICU(intensive care unit), IL(interleukin), LDH(lactate dehydrogenase), PCR(polymerase chain reaction), TNF(tumor necrotizing factor), WBC(white blood cell).

Table S2. Summary profiles of symptomatic patients.

| Author (year)             | Age /Sex | Country | Presenting symptoms |                                                          |          |        | Lab findings                                                |          |                                                                    |        | Image findings | Remarkable past history                                                                                                                                       | ICU admission | ART | Treatment                                                                                 | Outcome         | Survival |
|---------------------------|----------|---------|---------------------|----------------------------------------------------------|----------|--------|-------------------------------------------------------------|----------|--------------------------------------------------------------------|--------|----------------|---------------------------------------------------------------------------------------------------------------------------------------------------------------|---------------|-----|-------------------------------------------------------------------------------------------|-----------------|----------|
|                           |          |         | Fever               | Respiratory                                              | GI       | Others | CBC                                                         | CRP      | Chemistry                                                          | Others |                |                                                                                                                                                               |               |     |                                                                                           |                 |          |
| 1. Li et al. (2020)[1]    | 3 Y/M    |         | Fever               | Cough, Sputum, Runny nose                                | -        | -      | WBC 15.0*10 <sup>9</sup> /L                                 |          |                                                                    |        |                | Nine days after onset of symptoms, patchy ground-glass opacification of the left lower lobe. Seven days subsequently, during antiviral treatment, normalized. | ?             |     | Antiviral, anti-infective therapy, immunoglobulin therapy                                 | Discharged home | Alive    |
| 2. Liu et al. (2020)[2,5] | 3 Y/F    | China   | High fever (>39 °C) | Cough, Tachypnea, Pharyngeal congestion, Swollen tonsils | Vomiting | -      | Low WBC, low neutrophil count, low lymphocyte count, low Hb | High CRP | High D-dimer, high AST, low Cr, high LDH, high Mg, low bicarbonate |        |                | Patchy ground-glass opacities in both lungs                                                                                                                   | Yes           |     | Ribavirin, Oseltamivir, Glucocorticoids, Supplemental oxygen, Intravenous immune globulin |                 |          |
|                           | 7 Y/F    | China   | High fever (>40 °C) | Cough, Pharyngeal congestion, Swollen tonsils            | -        | -      | Low lymphocyte count                                        | High CRP | Low Cr, low bicarbonate                                            |        |                | NA                                                                                                                                                            | No            |     | Oseltamivir                                                                               |                 |          |

|              |       |                     |                                                       |          |   |                                                                                        |          |                                                                                          |                              |    |                              |
|--------------|-------|---------------------|-------------------------------------------------------|----------|---|----------------------------------------------------------------------------------------|----------|------------------------------------------------------------------------------------------|------------------------------|----|------------------------------|
| 3<br>Y/<br>F | China | High fever (>41 °C) | Cough, Pharyngeal congestion, Swollen tonsils         | Vomiting | - | Low lymphocyte count, high ESR                                                         | High CRP | High D-dimer, high AST, low Cr, high LDH, low Na, low chlorine, high Mg, low bicarbonate | Patchy shadows in both lungs | No | Oseltamivir, Glucocorticoids |
| 1<br>Y/<br>M | China | High fever (>42 °C) | Cough, Wheeze, Pharyngeal congestion, Swollen tonsils | -        | - | Low WBC, low neutrophil count, low lymphocyte count, high AST, low Cr, low bicarbonate | High CRP |                                                                                          | Patchy shadows in both lungs | No | Oseltamivir, Glucocorticoids |
| 3<br>Y/<br>F | China | High fever (>43 °C) | Cough, Wheeze, Swollen tonsils                        | Vomiting | - | Low WBC, low lymphocyte count, high ESR                                                | High CRP | High D-dimer, high ALT, high AST, low Cr, low Na, low bicarbonate                        | Patchy shadows in both lungs | No | Oseltamivir, Glucocorticoids |
| 4<br>Y/<br>M | China | High fever (>44 °C) | Cough, Pharyngeal congestion, Swollen                 | Vomiting | - | Low WBC, low neutrophil count, low lymphocyte count                                    |          | Low Cr, low Na, low bicarbonate                                                          | Normal                       | No | Ribavirin, Oseltamivir       |

|                                  |              |       |                                          |                                      |   |                                                                           |                               |                                                                                       |                                                                                      |                                                               |     |                                                                                                                                                                                                                                 |                 |       |
|----------------------------------|--------------|-------|------------------------------------------|--------------------------------------|---|---------------------------------------------------------------------------|-------------------------------|---------------------------------------------------------------------------------------|--------------------------------------------------------------------------------------|---------------------------------------------------------------|-----|---------------------------------------------------------------------------------------------------------------------------------------------------------------------------------------------------------------------------------|-----------------|-------|
|                                  |              |       | tonsils                                  |                                      |   |                                                                           |                               |                                                                                       |                                                                                      |                                                               |     |                                                                                                                                                                                                                                 |                 |       |
| <b>3. Sun et al. (2020)[26]*</b> | 8 Y/M        | Fever | Cough, Expector<br>ation,<br>Polypnea    | -                                    | - | Low leukocytes,<br>low<br>neutrophils,<br>low<br>lymphocytes,<br>low Hb   | High CRP                      | High procalcitonin,<br>high<br>LDH,<br>high<br>ALT                                    | Bilateral pneumonia,<br>Multiple patch-like shadows,<br>GGO, “white lung” appearance | Acute lymphocytic leukemia (infection with Influenza A virus) | Yes | Oxygen therapy,<br>Mechanical Ventilation,<br>Antibiotic treatment,<br>Antiviral treatment,<br>Glucocorticoids,<br>Intravenous immunoglobulin therapy,<br>(Traditional Chinese medicine)*                                       | Remained in ICU | Alive |
|                                  | 10 M/F       | -     | Cough,<br>Expector<br>ation,<br>Polypnea | Constipation,<br>Nausea,<br>Vomiting | - | High leukocytes,<br>high<br>neutrophils,<br>low<br>thrombocyte,<br>low Hb | High CRP                      | High procalcitonin,<br>high<br>LDH,<br>high<br>ALT,<br>high<br>CK,<br>high<br>D-dimer | Bilateral pneumonia,<br>Multiple patch-like shadows,<br>pleural effusion,<br>GGO     | Lacrimal sac dredge                                           | Yes | Oxygen therapy,<br>Antibiotic treatment,<br>Antiviral treatment,<br>Glucocorticoids,<br>Intravenous immunoglobulin therapy,<br>(Enterostomy,<br>hemopurification,<br>transfusions of red blood cell,<br>plasma and thrombocyte) | Remained in ICU | Alive |
|                                  | 1 Y1 M / 1 M | Fever | Polypnea                                 | Diarrhea,<br>Nausea,<br>Vomiting     | - | Low Hb                                                                    | Low creatine,<br>high D-dimer | Bilateral pneumonia,<br>Multiple patch-like shadows,<br>GGO                           |                                                                                      |                                                               | Yes | Oxygen therapy,<br>Mechanical Ventilation,<br>Antibiotic treatment,<br>Antiviral treatment,<br>Glucocorticoids,                                                                                                                 | Discharged      | Alive |

|                              |       |                                      |                                  |   |                                                                                            |          |                                                                         |                                                          |             |                                                                                                                                            |                                              |            |       |
|------------------------------|-------|--------------------------------------|----------------------------------|---|--------------------------------------------------------------------------------------------|----------|-------------------------------------------------------------------------|----------------------------------------------------------|-------------|--------------------------------------------------------------------------------------------------------------------------------------------|----------------------------------------------|------------|-------|
|                              |       |                                      |                                  |   |                                                                                            |          |                                                                         |                                                          |             | (Plasmapheresis)                                                                                                                           |                                              |            |       |
| 2<br>M<br>/<br>M             | -     | Cough,<br>Expectoration,<br>Polypnea | Nausea,<br>Vomiting              | - | High lymphocytes, high thrombocyte                                                         |          | High procalcitonin, high LDH, high ALT, low Cr                          | Unilateral pneumonia,<br>Multiple patch-like shadows     | Yes         | Oxygen therapy,<br>Antiviral treatment                                                                                                     | Discharged                                   | Alive      |       |
| 2<br>Y<br>1<br>M<br>/<br>M   | Fever | Cough,<br>Polypnea                   | Diarrhea,<br>Nausea,<br>Vomiting | - |                                                                                            | High CRP | High procalcitonin, high LDH, low AST, high ALT, high Cr kinase, low Cr | Bilateral pneumonia,<br>Multiple patch-like              | Pharyngitis | Yes                                                                                                                                        | Antibiotic treatment,<br>Antiviral treatment | Discharged | Alive |
| 15<br>Y/<br>F                | Fever | Cough,<br>Polypnea                   | Diarrhea                         | - | Mildly High leukocytes, mildly high neutrophils, mildly high lymphocytes, high thrombocyte |          | High LDH, low AST, low ALT, high Cr                                     | Bilateral pneumonia,<br>Multiple patch-like shadows, GGO | Yes         | Antibiotic treatment,<br>Antiviral treatment,<br>Glucocorticoids,<br>Intravenous immunoglobulin therapy,<br>(Traditional Chinese medicine) | Discharged                                   | Alive      |       |
| 13<br>Y<br>11<br>M<br>/<br>M | Fever | Cough,<br>Polypnea                   | -                                | - | Mildly high Hb                                                                             | High CRP | High procalcitonin, low AST                                             | Bilateral pneumonia,<br>GGO                              | Yes         | Oxygen therapy,<br>Antiviral treatment,<br>Glucocorticoids,<br>Intravenous immunoglobulin therapy,<br>(Traditional Chinese medicine)       | Discharged                                   | Alive      |       |

|                                  |                       |       |                       |                                 |                  |   |                                                                                                  |                       |                                 |                                                                                                                                                       |   |     |                                                                                    |                                       |                                                                  |       |
|----------------------------------|-----------------------|-------|-----------------------|---------------------------------|------------------|---|--------------------------------------------------------------------------------------------------|-----------------------|---------------------------------|-------------------------------------------------------------------------------------------------------------------------------------------------------|---|-----|------------------------------------------------------------------------------------|---------------------------------------|------------------------------------------------------------------|-------|
|                                  | 13                    |       | Fever                 | Expectoration,<br>Polypnea      | -                | - |                                                                                                  |                       | Low AST,<br>low ALT,<br>high Cr | Unilateral<br>pneumonia,<br>Multiple<br>mottling, GGO                                                                                                 |   | Yes | Oxygen therapy,<br>Antiviral<br>treatment,<br>(Traditional<br>Chinese<br>medicine) | Remained<br>in ICU                    | Alive                                                            |       |
|                                  | Y<br>5<br>M<br>/<br>M |       |                       |                                 |                  |   |                                                                                                  |                       |                                 |                                                                                                                                                       |   |     |                                                                                    |                                       |                                                                  |       |
| <b>4. Ji et al. (2020)[27]</b>   | 15                    | China | Fever<br>(37.9<br>°C) | Pharyngeal<br>congestion        | -                | - | WBC<br>11.82*10 <sup>9</sup> /L<br>(67.3%<br>neutrophils,<br>25.7%<br>lymphocytes)               | 34.6<br>4<br>mg/<br>L |                                 | Normal                                                                                                                                                | - | -   | -                                                                                  | Symptomatic<br>treatment was<br>given | Symptoms<br>disappeared<br>after<br>treatment<br>for two<br>days | Alive |
|                                  | Y/<br>M               |       |                       |                                 |                  |   |                                                                                                  |                       |                                 |                                                                                                                                                       |   |     |                                                                                    |                                       |                                                                  |       |
|                                  | 9                     | China | -                     | Small<br>amount<br>of<br>sputum | Mild<br>diarrhea | - | WBC<br>6.6*10 <sup>9</sup> /L<br>(34.1%<br>neutrophils,<br>52%<br>lymphocytes)                   | 3.49<br>mg/<br>L      |                                 | Normal                                                                                                                                                | - | -   | -                                                                                  | Oral probiotic                        | Symptoms<br>disappeared<br>after<br>treatment<br>for two<br>days | Alive |
|                                  | Y/<br>M               |       |                       |                                 |                  |   |                                                                                                  |                       |                                 |                                                                                                                                                       |   |     |                                                                                    |                                       |                                                                  |       |
| <b>5. Park et al. (2020)[28]</b> | 10                    | Korea | Fever                 | Sputum                          | -                | - | WBC<br>4,080/μL<br>(37.3%<br>lymphocytes),<br>Hb<br>13.5g/dl,<br>platelet<br>count<br>251,000/μL | <0.4<br>mg/<br>dl     |                                 | CT: Patchy or<br>nodular<br>consolidations<br>with<br>peripheral<br>ground glass<br>opacities in<br>subpleural<br>areas of the<br>right lower<br>lobe | - | -   | -                                                                                  | -                                     | -                                                                | -     |
|                                  | Y/<br>F               |       |                       |                                 |                  |   |                                                                                                  |                       |                                 |                                                                                                                                                       |   |     |                                                                                    |                                       |                                                                  |       |
| <b>6. Cao et al. (2020)[31]</b>  | 3                     | China | Fever                 | -                               | -                | - | WBC<br>9690/mm <sup>3</sup><br>(45%<br>neutrophils,<br>44%<br>lymphocytes)                       |                       |                                 | CT: mildly<br>increased<br>infiltrates at<br>bilateral lung                                                                                           |   |     |                                                                                    | Supportive<br>treatment               | Discharged                                                       | Alive |
|                                  | M<br>/F               |       |                       |                                 |                  |   |                                                                                                  |                       |                                 |                                                                                                                                                       |   |     |                                                                                    |                                       |                                                                  |       |

|                                     |      |        |       |                                    |                    |   |                                                             |                      |  |                                                 |   |     |    |                                                                                                                                                           |                     |       |
|-------------------------------------|------|--------|-------|------------------------------------|--------------------|---|-------------------------------------------------------------|----------------------|--|-------------------------------------------------|---|-----|----|-----------------------------------------------------------------------------------------------------------------------------------------------------------|---------------------|-------|
|                                     | 7    | China  | Fever | -                                  | -                  | - | -                                                           |                      |  | -                                               | - | -   | -  | -                                                                                                                                                         | -                   | -     |
|                                     | Y/M  |        |       |                                    |                    |   |                                                             |                      |  |                                                 |   |     |    |                                                                                                                                                           |                     |       |
|                                     | -    | China  | -     | Runny nose                         | Vomiting           | - | WBC 7660/mm <sup>3</sup> (15% neutrophils, 73% lymphocytes) |                      |  | CT: mildly increased bilateral linear opacities |   |     |    |                                                                                                                                                           | -                   | -     |
|                                     | 30   | China  | -     | Respiratory distress without fever | -                  | - | -                                                           |                      |  | -                                               | - | -   | -  | -                                                                                                                                                         | -                   | -     |
|                                     | h/-  |        |       |                                    |                    |   |                                                             |                      |  |                                                 |   |     |    |                                                                                                                                                           |                     |       |
|                                     | 1    | China  | Fever | Respiratory distress               | Diarrhea, Vomiting | - | -                                                           |                      |  | CT: showed pneumonia                            | - | Yes | -  | Assisted ventilation, continuous venovenous hemofiltration                                                                                                | Recovered gradually | Alive |
|                                     | Y/M  |        |       |                                    |                    |   |                                                             |                      |  |                                                 |   |     |    |                                                                                                                                                           |                     |       |
| <b>7. Cui et al. (2020)[29]</b>     | 55   | China  | -     | Dry cough, Rhinorrhea              | -                  | - | Elevated lymphocyte, platelet                               | Elevated AST/ALT, CK |  | CT: Patchy shadows and GGO in Rt. lung          | - | No  | No | Inhaled interferon $\alpha$ -1b, amoxicillin potassium clavulanate, reduced glutathione, ursodeoxycholic acid, traditional Chinese medicine lotus qingwen | Improved            | Alive |
|                                     | D/F  |        |       |                                    |                    |   |                                                             |                      |  |                                                 |   |     |    |                                                                                                                                                           |                     |       |
| <b>8. Spiteri et al. (2020)[30]</b> | 4    | Europe | -     | -                                  | -                  | - |                                                             |                      |  |                                                 |   |     |    |                                                                                                                                                           |                     |       |
|                                     | case |        |       |                                    |                    |   |                                                             |                      |  |                                                 |   |     |    |                                                                                                                                                           |                     |       |
|                                     | ≤    |        |       |                                    |                    |   |                                                             |                      |  |                                                 |   |     |    |                                                                                                                                                           |                     |       |
|                                     | 17   |        |       |                                    |                    |   |                                                             |                      |  |                                                 |   |     |    |                                                                                                                                                           |                     |       |

ye  
ar  
s  
ol  
d

|                        |    |       |       |                         |          |   |                                                             |                         |                         |                                             |       |
|------------------------|----|-------|-------|-------------------------|----------|---|-------------------------------------------------------------|-------------------------|-------------------------|---------------------------------------------|-------|
| 9. Xu et al. (2020)[4] | 6  | China | Fever | Cough                   | Diarrhea | - | Elevated neutrophils, decreased lymphocytes, elevated ESR   | Elevated procalcitonin  |                         | A-interferon oral spray, azithromycin, IVIG | Alive |
|                        | 12 | China | Fever | Sore throat, Rhinorrhea | -        | - | Decreased leukocytes, Decreased lymphocytes                 | Increased procalcitonin |                         | A-interferon oral spray                     | Alive |
|                        | 7  | China | Fever | Cough, Sore throat      | Diarrhea | - | Decreased lymphocytes                                       | Increase CRP            | Increased procalcitonin | A-interferon oral spray                     | Alive |
|                        | 1  | China | Fever | -                       | -        | - | Decreased neutrophils, increased lymphocytes, increased ESR | Increased AST           |                         | A-interferon oral spray                     | Alive |
|                        | 3  | China | -     | Rhinorrhea              | -        | - | None                                                        |                         |                         | A-interferon oral spray                     | Alive |
|                        | 15 | China | Fever | -                       | -        | - | Decreased leukocytes, decreased neutrophils,                | Increase CRP            |                         | A-interferon oral spray                     | Alive |

|                                               |                   |       |           |                          |              |             |                                                                                                                                                  |                          |                                                         |  |    |        |                            |        |       |
|-----------------------------------------------|-------------------|-------|-----------|--------------------------|--------------|-------------|--------------------------------------------------------------------------------------------------------------------------------------------------|--------------------------|---------------------------------------------------------|--|----|--------|----------------------------|--------|-------|
|                                               |                   |       |           |                          |              |             | increased<br>ESR                                                                                                                                 |                          |                                                         |  |    |        |                            |        |       |
|                                               | 13<br>Y/<br>M     | China | Feve<br>r | Cough,<br>Sore<br>throat | -            | -           |                                                                                                                                                  | Incr<br>ease<br>d<br>CRP | Increased<br>procalcito<br>nin                          |  |    |        | A-interferon<br>oral spray |        | Alive |
|                                               | 2<br>M<br>/F      | China | -         | Cough,<br>Sore<br>throat | -            | -           | Decreased<br>neutrophil,<br>increased<br>lymphocyt<br>es                                                                                         |                          | Increased<br>AST/ALT,<br>increased<br>procalcito<br>nin |  |    |        | A-interferon<br>oral spray |        | Alive |
|                                               | 1<br>Y/<br>M      | China | Feve<br>r | Cough                    | Diarr<br>hea | -           | Not<br>available                                                                                                                                 |                          |                                                         |  |    |        | A-interferon<br>oral spray |        | Alive |
| <b>10. Liu<br/>et al.<br/>(2020)[3<br/>1]</b> | 5<br>Y/<br>F      | China | Feve<br>r | Cough                    | -            | Fatig<br>ue | Decreased<br>leukocyte<br>count,<br>decreased<br>neutrophil<br>ratio,<br>increased<br>lymphocyt<br>e count,<br>increased<br>lymphocyt<br>e ratio |                          | Normal                                                  |  | No | N<br>o | -                          | Stable | Alive |
|                                               | 11<br>M<br>/<br>M | China | Feve<br>r | Cough                    | -            | -           | Decreased<br>neutrophil<br>ratio,<br>increased<br>lymphocyt<br>e count,<br>increased<br>lymphocyt<br>e ratio                                     |                          | Single<br>consolidation                                 |  | No | N<br>o | -                          |        | Alive |
|                                               | 9<br>Y/<br>F      | China | Feve<br>r | -                        | -            | -           | Decreased<br>lymphocyt<br>e ratio                                                                                                                |                          | GGO                                                     |  | No | N<br>o | -                          |        | Alive |

|                                              |                  |         |                 |                                           |                          |                       |                                                      |  |                         |     |           |                                                                 |                   |
|----------------------------------------------|------------------|---------|-----------------|-------------------------------------------|--------------------------|-----------------------|------------------------------------------------------|--|-------------------------|-----|-----------|-----------------------------------------------------------------|-------------------|
|                                              | 2<br>M<br>/<br>M | China   | -               | Cough                                     | -                        | Fatigue               | Increase<br>d<br>CRP                                 |  | Multiple consolidations | No  | No        | -                                                               | Alive             |
| <b>11. Zhang et al. (2020)[32]</b>           | 9<br>Y/<br>M     |         | Fever           | Nasal congestion, Sore throat, Runny nose | Gastric appetite, Nausea | Muscle pain, Headache | Mild high WBC                                        |  | High CRP, low CK        |     | High IL-6 | Interferon, Chinese medicine, vitamin C, antibiotic application |                   |
|                                              | 6<br>Y/<br>M     |         | -               | Cough                                     | -                        | -                     | High Hb                                              |  | Low CK                  |     |           | Interferon, Chinese medicine, vitamin C                         |                   |
|                                              | 8<br>Y/<br>M     |         | Low grade fever | Nasal congestion, Rhinorrhea              | -                        | -                     | High Hb, low neutrophil ratio, high lymphocyte ratio |  | Low ALT, low CK         |     |           | Interferon, Chinese medicine, vitamin C                         |                   |
| <b>12. Le et al. (2020)[33]</b>              | 3<br>M<br>/F     | Vietnam | Fever           | Rhinorrhea                                | -                        | Myalgia               | Mild high WBC                                        |  | High CK                 | Yes |           | Azithromycin,                                                   | Discharged        |
| <b>13. Ma et al. (2020)[51]</b>              | 8<br>Y/<br>F     | China   | Fever           | -                                         | -                        | -                     |                                                      |  |                         |     |           |                                                                 | Improved<br>Alive |
|                                              | 3<br>Y/<br>F     | China   | Fever           | -                                         | -                        | -                     |                                                      |  |                         |     |           |                                                                 | Improved<br>Alive |
| <b>14. Lou et al. (2020)[34]<sup>†</sup></b> | 6<br>Y/<br>F     | China   | Fever           | Cough                                     | -                        | -                     |                                                      |  |                         |     |           | Interferon- $\alpha$ 2b                                         |                   |
|                                              | 8<br>Y/<br>F     | China   | Fever           | -                                         | -                        | -                     |                                                      |  |                         |     |           | Interferon- $\alpha$ 2b                                         |                   |

|                                   |                            |       |                           |                   |           |           |                                                                    |                 |                         |                             |                                               |                                                          |                                                       |            |       |  |
|-----------------------------------|----------------------------|-------|---------------------------|-------------------|-----------|-----------|--------------------------------------------------------------------|-----------------|-------------------------|-----------------------------|-----------------------------------------------|----------------------------------------------------------|-------------------------------------------------------|------------|-------|--|
|                                   | 6<br>M<br>/<br>M           | China | Feve<br>r                 | -                 | -         | -         |                                                                    |                 |                         |                             |                                               |                                                          |                                                       |            |       |  |
| <b>15. Li et al. (2020)[35]</b>   | 10<br>M<br>/<br>M          | China | Feve<br>r                 | -                 | -         | -         | Increased lymphocytes                                              | Incr ease d CRP |                         |                             | CT: diffuse GGO                               |                                                          |                                                       |            |       |  |
| <b>16. Dong et al. (2020)[36]</b> | 3<br>Y/<br>M               | China | -                         | Cough with phlegm | -         | -         | Normal                                                             | Nor mal         | Normal                  | Norm al seru m IgE          | CT: signs of pneumonia in the left upper lobe | Allergic rhinitis<br>Communit y-acquired pneumonia (CAP) | Inhalation of interferon- $\alpha$<br>Supportive care | Discharged | Alive |  |
|                                   | 2<br>Y<br>4<br>M<br>/<br>M | China | Feve<br>r<br>(39.2<br>°C) | -                 | -         | -         | Normal                                                             | Nor mal         | Normal                  | Seru m IgE level: 173 IU/ml | CT: bilateral pneumonia                       | Atopic dermatitis                                        | Inhalation of interferon- $\alpha$<br>Supportive care | Discharged | Alive |  |
| <b>17. Zeng et al. (2020)[61]</b> | 2<br>d/<br>M               | China | Feve<br>r                 | -                 | -         | Letha rgy | Normal                                                             |                 |                         |                             | CT: pneumonia                                 | Yes                                                      |                                                       | Negative   | Alive |  |
|                                   | 2<br>d/<br>M               | China | Feve<br>r                 | -                 | Vomit ing | Letha rgy | Leukocytosis, lymphocytopenia                                      |                 | Elevated CK-MB fraction |                             | CT: pneumonia                                 |                                                          |                                                       | Negative   | Alive |  |
| <b>18. Su et al. (2020)[22]</b>   | 3<br>Y<br>7<br>M<br>/F     | China | Feve<br>r                 | -                 | -         | -         | WBC 7.55*10 <sup>9</sup> /L (20.4% neutrophils, 73.6% lymphocytes) | 0.35 mg/L       |                         |                             | Bronchitis                                    |                                                          |                                                       | Discharged | Alive |  |
|                                   | 8<br>Y                     | China | Feve<br>r                 | -                 | -         | -         | WBC 3.78*10 <sup>9</sup> /L                                        | 0.19 mg/        |                         |                             | Negative                                      |                                                          |                                                       | Discharged | Alive |  |

|                                               |       |              |                    |                                                          |   |   |                                                                                   |                          |                                                              |  |                                       |  |                          |
|-----------------------------------------------|-------|--------------|--------------------|----------------------------------------------------------|---|---|-----------------------------------------------------------------------------------|--------------------------|--------------------------------------------------------------|--|---------------------------------------|--|--------------------------|
| 1<br>M<br>/F                                  |       |              |                    |                                                          |   |   | (38.7%<br>neutrophils,<br>43.9%<br>lymphocytes)                                   | L                        |                                                              |  |                                       |  |                          |
| 5<br>Y<br>7<br>M<br>/F                        | China | -            | Mild, dry<br>cough | -                                                        | - |   | WBC<br>3.69*10 <sup>9</sup> /L<br>(33.8%<br>neutrophils,<br>53.3%<br>lymphocytes) | 0.12<br>mg/<br>L         |                                                              |  | Negative                              |  | Recover<br>Alive         |
| <b>19. Cai<br/>et al.<br/>(2020)[3<br/>7]</b> | China | 7<br>Y/<br>M | Fever              | Cough                                                    | - | - | Increased<br>WBC,<br>Increased<br>neutrophils                                     | Incr<br>ease<br>d<br>CRP | Increased<br>CK-MB,<br>Increased<br>D-dimer                  |  | -                                     |  | Symptomatic<br>Treatment |
| 10<br>Y/<br>F                                 | China |              | Fever              | Sore<br>throat,<br>Stuffy<br>nose                        | - | - |                                                                                   |                          |                                                              |  |                                       |  | Symptomatic<br>Treatment |
| 10<br>Y/<br>F                                 | China |              | Fever              | Cough,<br>Sore<br>throat,<br>Stuffy<br>nose              | - | - |                                                                                   | Incr<br>ease<br>d<br>CRP | Increased<br>CK-MB                                           |  | X-ray: Lt.<br>retrocardiac<br>opacity |  | Symptomatic<br>Treatment |
| 9<br>Y/<br>M                                  | China |              | Fever              | Cough,<br>Rhinorrh<br>ea,<br>Sneezing,<br>Sore<br>throat | - | - | Decreased<br>WBC,<br>Decreased<br>neutrophils                                     | Incr<br>ease<br>d<br>CRP | Increased<br>D-dimer                                         |  | X-ray:<br>Opacities in Rt.<br>Lung    |  | Symptomatic<br>Treatment |
| 7<br>M<br>/F                                  | China |              | -                  | Cough,<br>Rhinorrh<br>ea,<br>Sneezing,<br>Stuffy<br>nose | - | - |                                                                                   |                          | Increased<br>CK-MB,<br>Increased<br>ALT,<br>Increased<br>AST |  | X-ray:<br>Opacities in Rt.<br>Lung    |  | Symptomatic<br>Treatment |
| 6                                             | China |              | Fever              | Rhinorrh                                                 | - | - | Decreased                                                                         |                          |                                                              |  |                                       |  | Symptomatic              |

|                                               |                   |       |           |                          |   |   |                                                       |                    |                                    |                                         |
|-----------------------------------------------|-------------------|-------|-----------|--------------------------|---|---|-------------------------------------------------------|--------------------|------------------------------------|-----------------------------------------|
|                                               | Y/<br>F           |       | r         | ea                       |   |   | neutrophil                                            |                    |                                    | Treatment,<br>Antibiotic                |
|                                               | 3<br>M<br>/F      | China | Feve<br>r | -                        | - | - | Increased<br>lymphocyt<br>e,<br>Increased<br>PLATELET | Increased<br>AST   |                                    | Symptomatic<br>Treatment,<br>Antibiotic |
|                                               | 4<br>Y/<br>F      | China | -         | Cough                    | - | - | Decreased<br>neutrophil                               | Increased<br>CK-MB | X-ray:<br>Opacities in Rt.<br>Lung | Symptomatic<br>Treatment,<br>Antibiotic |
|                                               | 8<br>Y/<br>M      | China | Feve<br>r | Sore<br>throat           | - | - | Increased<br>WBC,<br>Increased<br>PLATELET            | Increased<br>CK-MB |                                    | Symptomatic<br>Treatment,<br>Antibiotic |
|                                               | 5<br>Y/<br>M      | China | Feve<br>r | Cough                    | - | - | Increased<br>WBC                                      |                    |                                    | Symptomatic<br>Treatment,<br>Antibiotic |
| <b>20. Wei<br/>et al.<br/>(2020)[7<br/>1]</b> | 9<br>M<br>/F      | China | Feve<br>r | -                        | - | - |                                                       |                    |                                    | No                                      |
|                                               | 11<br>M<br>/F     | China | Feve<br>r | -                        | - | - |                                                       |                    |                                    | No                                      |
|                                               | 10<br>M<br>/<br>M | China | -         | -                        | - | - |                                                       |                    |                                    | No                                      |
|                                               | 7<br>M<br>/F      | China | Feve<br>r | -                        | - | - |                                                       |                    |                                    | No                                      |
|                                               | 1<br>M<br>/F      | China | -         | Cough,<br>Rhinorrh<br>ea | - | - |                                                       |                    |                                    | No                                      |
|                                               | 3<br>M<br>/F      | China | -         | Cough,<br>Sputum         | - | - |                                                       |                    |                                    | No                                      |
|                                               | 3                 | China | Feve      | -                        | - | - |                                                       |                    |                                    | No                                      |

|                                      |           |        |                 |                                                             |   |                                       |                                                             |                                     |                                                                                         |                                                                                                                      |                                                                                                                                     |     |     |                                                                                                                                                                                               |            |       |  |
|--------------------------------------|-----------|--------|-----------------|-------------------------------------------------------------|---|---------------------------------------|-------------------------------------------------------------|-------------------------------------|-----------------------------------------------------------------------------------------|----------------------------------------------------------------------------------------------------------------------|-------------------------------------------------------------------------------------------------------------------------------------|-----|-----|-----------------------------------------------------------------------------------------------------------------------------------------------------------------------------------------------|------------|-------|--|
|                                      | M         |        |                 |                                                             |   |                                       |                                                             |                                     |                                                                                         |                                                                                                                      |                                                                                                                                     |     |     |                                                                                                                                                                                               |            |       |  |
|                                      | /F        |        |                 |                                                             |   |                                       |                                                             |                                     |                                                                                         |                                                                                                                      |                                                                                                                                     |     |     |                                                                                                                                                                                               |            |       |  |
|                                      | 6         | China  | -               | -                                                           | - | -                                     |                                                             |                                     |                                                                                         |                                                                                                                      |                                                                                                                                     |     |     | No                                                                                                                                                                                            |            |       |  |
|                                      | M         |        |                 |                                                             |   |                                       |                                                             |                                     |                                                                                         |                                                                                                                      |                                                                                                                                     |     |     |                                                                                                                                                                                               |            |       |  |
|                                      | /         |        |                 |                                                             |   |                                       |                                                             |                                     |                                                                                         |                                                                                                                      |                                                                                                                                     |     |     |                                                                                                                                                                                               |            |       |  |
|                                      | M         |        |                 |                                                             |   |                                       |                                                             |                                     |                                                                                         |                                                                                                                      |                                                                                                                                     |     |     |                                                                                                                                                                                               |            |       |  |
| <b>21. Odievre et al. (2020)[38]</b> | 16 Y/F    | France | Isolated fever  | Respiratory distress syndrome, Superficial tachypnea 80/min | - | Acute chest pain, Tachycardia 140/min | 355 mg/L                                                    | LDH 446 U/L, D-dimer 23,611 ng/ml   | Spo2 85%, high IL-6 629 pg/ml, high TNF- $\alpha$ 32.5pg/ml, normal IL-1 $\beta$ normal | CTPA: bilateral pulmonary embolism complicating the ACS, bilateral consolidations with a halo sign on the right side | Homozygous SCD with bilateral ischemic retinopathy, exchange transfusions from 5 to 11yrs old, switched, thereafter for hydroxyurea | Yes | Yes | Non-invasive ventilation, red blood cell exchange transfusion followed by simple transfusion (hemoglobin nadir 6.4 g/dl), anticoagulation, 1 pulse of intravenous Tocilizumab (TCZ, 8 mg/kg), | Recover    | Alive |  |
| <b>22. Wu et al. (2020)[39]</b>      | 2 Y/M     | China  | -               | -                                                           | - | Conjunctivitis, Eyelid dermatitis     | High lymphocyte (4.48*10 <sup>9</sup> /L)                   | High myoglobin                      | CT: normal                                                                              |                                                                                                                      |                                                                                                                                     | No  | No  | National protocol in China                                                                                                                                                                    | Recover    | Alive |  |
| <b>23. Dugue et al. (2020)[40]</b>   | 6 weeks/M | USA    | Fever (38.4 °C) | Cough                                                       | - | Mild hypertension (114/57), seizure   | WBC 5.07 *10 <sup>3</sup> / $\mu$ L, normal differentiation | Procalcitonin(0.21ng/ml), e' normal | Rhinovirus/enterovirus PCR positive, abnormal                                           | Brain MRI: normal                                                                                                    | MRI: None                                                                                                                           | No  | No  |                                                                                                                                                                                               | Discharged | Alive |  |

|                                   |    |                       |                    |                                        |              |            |            |        |                                                                            |                                                                |      |     |       | EEG                                        |       |
|-----------------------------------|----|-----------------------|--------------------|----------------------------------------|--------------|------------|------------|--------|----------------------------------------------------------------------------|----------------------------------------------------------------|------|-----|-------|--------------------------------------------|-------|
| <b>24. See et al. (2020)[8]</b>   | 18 | Malaysia (from china) | Mild fever         | -                                      | Diarrhea     | -          |            |        | Renal and liver profile normal                                             |                                                                | None | No  | No    | Paracetamol and Oral Rehydration Salts     | Alive |
|                                   | 4  | Malaysia (from china) | Intermittent fever | Cough (2-4 weeks), Rhinorrhea          | -            | -          |            |        | No blood Cx                                                                |                                                                | None | No  | No    | Paracetamol, oral penicillin V, loratadine | Alive |
|                                   | 11 | Malaysia (from china) | -                  | Mild cough (later diagnosed as asthma) | -            | -          |            |        | X-ray: perihilar opacities                                                 |                                                                | None | No  | No    | MDI salbutamol prn                         | Alive |
| <b>25. Yang et al. (2020)[10]</b> | 37 | China                 | -                  | Vomiting                               | Hypoglycemia | -          | Normal CBC | Normal | High myoglobin, high CK-MB, high D-dimer (2591)                            |                                                                |      | Yes |       | Discharged                                 | Alive |
|                                   | 36 | China                 | -                  | -                                      | -            | Moan, spit | Normal CBC | Normal | High procalcitonin (48hrs), high myoglobin, high CK-MB, high D-dimer (611) | X-ray: (premature) bilateral GO, granular high-density shadows |      | Yes | NCPAP | Discharged                                 | Alive |
|                                   | 36 | China                 | -                  | -                                      | -            | Moan       | Normal CBC | Normal | High AST (74)>48hr                                                         |                                                                |      | Yes | NCPAP | Discharged                                 | Alive |

|                                        |                             |       |           |          |                       |                    |               |            |                                                                  |                             |                                           |      |                            |            |       |
|----------------------------------------|-----------------------------|-------|-----------|----------|-----------------------|--------------------|---------------|------------|------------------------------------------------------------------|-----------------------------|-------------------------------------------|------|----------------------------|------------|-------|
|                                        |                             |       |           |          |                       |                    |               |            | normal<br>(46), high<br>myocardia<br>l globin,<br>high CK-<br>MB |                             |                                           |      |                            |            |       |
| 26.<br>Tan et<br>al.<br>(2020)[1<br>1] | 9<br>Y<br>5<br>M<br>/F      | China | -         | Cough    | Abdo<br>minal<br>pain | -                  | Normal<br>CBC | Nor<br>mal | High AST                                                         |                             | CT: GGO                                   | None | No oxygen, no<br>antiviral | Discharged | Alive |
|                                        | 11<br>Y<br>8<br>M<br>/F     | China | -         | Cough    | -                     | -                  | Normal<br>CBC | Nor<br>mal | Normal                                                           |                             |                                           | None | No oxygen, no<br>antiviral | Discharged | Alive |
|                                        | 2<br>Y/<br>F                | China | Feve<br>r | Vomiting | -                     | Conv<br>ulsio<br>n | Normal<br>CBC | Nor<br>mal | High AST,<br>high CK                                             | Myco<br>plasm<br>a<br>1:160 | CT: GGO                                   | None | No oxygen, no<br>antiviral | Discharged | Alive |
|                                        | 8<br>Y<br>9<br>M<br>/<br>M  | China | Feve<br>r | -        | Const<br>ipatio<br>n  | -                  | Normal<br>CBC | Nor<br>mal | Normal                                                           | Myco<br>plasm<br>a<br>1:160 |                                           | None | No oxygen, no<br>antiviral | Discharged | Alive |
|                                        | 12<br>Y<br>1<br>M<br>/<br>M | China | Feve<br>r | -        | -                     | -                  | Normal<br>CBC | Nor<br>mal | Normal                                                           |                             |                                           | None | No oxygen, no<br>antiviral | Discharged | Alive |
|                                        | 9<br>Y<br>3<br>M<br>/F      | China | -         | Cough    | -                     | -                  | Normal<br>CBC | Nor<br>mal | Normal                                                           | Myco<br>plasm<br>a 1:80     | CT: GGO,<br>multiple<br>nodule<br>shadows | None | No oxygen, no<br>antiviral | Discharged | Alive |
|                                        | 3                           | China | Feve<br>r | -        | -                     | -                  | Normal<br>CBC | Nor<br>mal | Normal                                                           |                             | CT: GGO                                   | None | No oxygen, no<br>antiviral | Discharged | Alive |

|     |                         |       |       |                                         |                  |                                |                                    |               |                                      |                                                                                 |        |    |           |                  |         |       |
|-----|-------------------------|-------|-------|-----------------------------------------|------------------|--------------------------------|------------------------------------|---------------|--------------------------------------|---------------------------------------------------------------------------------|--------|----|-----------|------------------|---------|-------|
|     | Y<br>7<br>M<br>/F       |       | r     |                                         |                  |                                | CBC                                | mal           |                                      |                                                                                 |        |    | antiviral |                  |         |       |
| 27. | 10<br>M<br>/F           | China | Fever | Dry cough                               | -                | Malaise                        | High WBC, high lymphocyte, low Hb, |               | High AST, low Cr, high LDH           |                                                                                 | None   | No | No        | Oseltamivir      | Recover | Alive |
| 28. | 4<br>M<br>/F            | Italy | Fever | Cough, rhinorrhea, respiratory distress |                  |                                |                                    |               |                                      | CXR: normal                                                                     | None   |    |           | Low-flow oxygen  |         |       |
|     | 11<br>M<br>/M           | Italy |       | Respiratory distress                    | Vomiting         |                                |                                    |               |                                      | CXR: normal                                                                     | None   |    |           | Low-flow oxygen  |         |       |
|     | 9<br>d/<br>F            | Italy | Fever |                                         |                  | Drowsiness, feeding difficulty |                                    | Not performed |                                      |                                                                                 | None   |    |           | High-flow oxygen |         |       |
|     | 15<br>Y<br>5<br>M<br>/F | Italy | Fever | Cough, rhinorrhea, respiratory distress |                  |                                | Thrombocytopenia                   |               | frequent respiratory tract infection | CXR: patchy and ground-glass-like opacity and interstitial changes in the lungs | None   |    |           | Low-flow oxygen  |         |       |
|     | 12<br>Y<br>6<br>M<br>/  | Italy |       | Cough, respiratory distress             | Nausea, vomiting |                                |                                    |               |                                      | CXR: pneumonia                                                                  | Autism |    |           | High-flow oxygen |         |       |

|                           |                             |       |       |                             |                |                                |                              |                                          |              |                                                                                                            |                                                                                 |                                        |                          |       |
|---------------------------|-----------------------------|-------|-------|-----------------------------|----------------|--------------------------------|------------------------------|------------------------------------------|--------------|------------------------------------------------------------------------------------------------------------|---------------------------------------------------------------------------------|----------------------------------------|--------------------------|-------|
|                           | M                           |       |       |                             |                |                                |                              |                                          |              |                                                                                                            |                                                                                 |                                        |                          |       |
|                           | 8<br>d/<br>M                | Italy | Fever |                             |                |                                |                              |                                          |              |                                                                                                            | None                                                                            |                                        | Low-flow oxygen          |       |
|                           | 6<br>Y<br>5<br>M<br>/F      | Italy | Fever |                             |                |                                |                              |                                          |              |                                                                                                            |                                                                                 |                                        | High-flow oxygen         |       |
|                           | 2<br>M<br>/<br>M            | Italy | Fever | Cough                       |                |                                |                              |                                          |              |                                                                                                            | CXR: ground-glass-like opacity and interstitial changes in the lungs            | Ventricular septal defect              | Non-invasive ventilation |       |
|                           | 14<br>Y<br>5<br>M<br>/<br>M | Italy |       | Cough, respiratory distress |                |                                |                              |                                          |              |                                                                                                            | CXR: patchy and ground-glass-like opacity and interstitial changes in the lungs | Epileptic encephalopathy (tracheotomy) | Mechanical ventilation   |       |
| 29. Lee et al. (2020)[42] | 15<br>Y/<br>F               | USA   | Fever | Cough                       | Abdominal pain | Decreased oral intake, fatigue | WBC 1460/uL, ANC 800cells/uL | Elevated ferritin, CRP, D-dimer, pro-BNP | Unremarkable | Familial dilated cardiomyopathy status post 3 <sup>rd</sup> heart transplantation & 1 <sup>st</sup> kidney |                                                                                 | 2L nasal cannula O2                    | Discharged               | Alive |

|                                            |               |       |                                           |       |        |            |        |                                                                                                                                                                                                               |                                                        |            |       |
|--------------------------------------------|---------------|-------|-------------------------------------------|-------|--------|------------|--------|---------------------------------------------------------------------------------------------------------------------------------------------------------------------------------------------------------------|--------------------------------------------------------|------------|-------|
|                                            |               |       |                                           |       |        |            |        | transplan 5<br>mo prior,<br>on<br>cyclospori<br>ne,<br>mycophen<br>olate<br>sodium,<br>and low-<br>dose<br>prednisone<br>, recent<br>total<br>lymphoid<br>irradiation                                         |                                                        |            |       |
| 13<br>M<br>/<br>M                          | USA           |       | Non-<br>producti<br>ve cough,<br>sneezing |       | Normal | Nor<br>mal | Normal | Hypoplasti<br>c left heart<br>syndrome,<br>post-<br>positive<br>cross-<br>match<br>heart<br>transplant<br>6 mo prior,<br>tacrolimus,<br>on<br>mycophen<br>olate<br>mofetil,<br>and low-<br>dose<br>prednisone | No change in<br>medications<br>(immunosuppre<br>ssion) | Discharged | Alive |
| 30.<br>Musoli<br>no, et<br>al.<br>(2020)[4 | 13<br>Y/<br>M | Italy | Fever                                     | Cough |        |            |        | Not performed                                                                                                                                                                                                 |                                                        |            |       |

|         |       |       |       |          |                       |           |  |                        |
|---------|-------|-------|-------|----------|-----------------------|-----------|--|------------------------|
| 3]      |       |       |       |          |                       |           |  |                        |
| 1       | Italy | Fever | Cough |          | High WBC              | 33.6 mg/L |  | Not performed          |
| Y/<br>F |       |       |       |          |                       |           |  |                        |
| 15      | Italy | Fever | Cough |          | Chest pain            |           |  | CXR: interstitial      |
| Y/<br>F |       |       |       |          |                       |           |  |                        |
| 1       | Italy | Fever | Cough |          |                       |           |  | Not performed          |
| Y/<br>F |       |       |       |          |                       |           |  |                        |
| 15      | Italy |       |       |          | Seizure (not related) |           |  | Consolidation          |
| Y/<br>M |       |       |       |          |                       |           |  |                        |
| 6       | Italy |       |       |          |                       |           |  | Not performed          |
| Y/<br>M |       |       |       |          |                       |           |  |                        |
| 16      | Italy | Fever | Cough |          | Chest pain, anosmia   | Low WBC   |  | Ground glass opacities |
| Y/<br>F |       |       |       |          |                       |           |  |                        |
| 10      | Italy | Fever |       | Diarrhea | Arthralgia, headache  |           |  | Not performed          |
| Y/<br>M |       |       |       |          |                       |           |  |                        |
| 12      | Italy | Fever |       | Diarrhea | Arthralgia, headache  |           |  | Not performed          |
| Y/<br>M |       |       |       |          |                       |           |  |                        |
| 7       | Italy | Fever |       |          | Arthralgia            |           |  | Not performed          |
| Y/<br>M |       |       |       |          |                       |           |  |                        |

\*Sun et al. (2020). Treatment in () means other treatments.

†Lou et al. did state that two of the three patients presented nasal congestion and rhinitis, but did not specify which.

Abbreviation: ALT(alanine transferase), ANC(absolute neutrophil count), ARDS(acute respiratory distress syndrome), AST(aspartate transferase), CBC(complete blood count), CK(creatine kinase), CK-MB(creatine kinase-myocardial band), Cr(creatinine), CRP(C-reactive protein), Cx(complication), EEG(electroencephalography), ESR(Erythrocyte sedimentation ratio), GI(gastrointestinal), Hb(hemoglobin), ICU(intensive care unit),

mo(month), IL(interleukin), LDH(lactate dehydrogenase), NA(not available), NCPAP(nasal continuous positive airway pressure) PCR(polymerase chain reaction), TNF(tumor necrotizing factor), WBC(white blood cell).

## References

- [1] Li W, Cui H, Li K, Fang Y, Li S. Chest computed tomography in children with COVID-19 respiratory infection. *Pediatr Radiol.* 2020;50:796-9.
- [2] Wang S, Guo L, Chen L, Liu W, Cao Y, Zhang J, et al. A case report of neonatal COVID-19 infection in China. *Clin Infect Dis.* 2020.
- [3] Cao Q, Chen YC, Chen CL, Chiu CH. SARS-CoV-2 infection in children: Transmission dynamics and clinical characteristics. *J Formos Med Assoc.* 2020;119:670-3.
- [4] Xu Y, Li X, Zhu B, Liang H, Fang C, Gong Y, et al. Characteristics of pediatric SARS-CoV-2 infection and potential evidence for persistent fecal viral shedding. *Nat Med.* 2020;26:502-5.
- [5] Ma X, Su L, Zhang Y, Zhang X, Gai Z, Zhang Z. Do children need a longer time to shed SARS-CoV-2 in stool than adults? *Journal of Microbiology, Immunology and Infection.* 2020;53:373-6.
- [6] Zeng L, Xia S, Yuan W, Yan K, Xiao F, Shao J, et al. Neonatal Early-Onset Infection With SARS-CoV-2 in 33 Neonates Born to Mothers With COVID-19 in Wuhan, China. *JAMA Pediatr.* 2020.
- [7] Wei M, Yuan J, Liu Y, Fu T, Yu X, Zhang ZJ. Novel Coronavirus Infection in Hospitalized Infants Under 1 Year of Age in China. *Jama.* 2020;323:1313-4.
- [8] See KC, Liew SM, Ng DCE, Chew EL, Khoo EM, Sam CH, et al. COVID-19: Four Paediatric Cases in Malaysia. *Int J Infect Dis.* 2020;94:125-7.
- [9] Poli P, Timpano S, Goffredo M, Padoan R, Badolato R. Asymptomatic case of Covid-19 in an infant with cystic fibrosis. *J Cyst Fibros.* 2020.
- [10] Yang P, Wang X, Liu P, Wei C, He B, Zheng J, et al. Clinical characteristics and risk assessment of newborns born to mothers with COVID-19. *J Clin Virol.* 2020;127:104356.
- [11] Tan YP, Tan BY, Pan J, Wu J, Zeng SZ, Wei HY. Epidemiologic and clinical characteristics of 10 children with coronavirus disease 2019 in Changsha, China. *J Clin Virol.* 2020;127:104353.
- [12] Zhang B, Liu S, Dong Y, Zhang L, Zhong Q, Zou Y, et al. Positive rectal swabs in young patients recovered from coronavirus disease 2019 (COVID-19). *J Infect.* 2020.
- [13] Hu Z, Song C, Xu C, Jin G, Chen Y, Xu X, et al. Clinical characteristics of 24 asymptomatic infections with COVID-19 screened among close contacts in Nanjing, China. *Sci China Life Sci.* 2020;63:706-11.
- [14] Chan JF, Yuan S, Kok KH, To KK, Chu H, Yang J, et al. A familial cluster of pneumonia associated with the 2019 novel coronavirus indicating person-to-person transmission: a study of a family cluster. *Lancet.* 2020;395:514-23.
- [15] Kam KQ, Yung CF, Cui L, Lin Tzer Pin R, Mak TM, Maiwald M, et al. A Well Infant with Coronavirus Disease 2019 (COVID-19) with High Viral Load. *Clin Infect Dis.* 2020.
- [16] Tang A, Tong ZD, Wang HL, Dai YX, Li KF, Liu JN, et al. Detection of Novel Coronavirus by RT-PCR in Stool Specimen from Asymptomatic Child, China. *Emerg Infect Dis.* 2020;26:1337-9.
- [17] Qian G, Yang N, Ma AHY, Wang L, Li G, Chen X, et al. A COVID-19 Transmission within a family cluster by presymptomatic infectors in China. *Clin Infect Dis.* 2020.
- [18] Lu S, Lin J, Zhang Z, Xiao L, Jiang Z, Chen J, et al. Alert for non-respiratory symptoms of Coronavirus Disease 2019 (COVID-19) patients in epidemic period: A case report of familial cluster with three asymptomatic COVID-19 patients. *J Med Virol.* 2020.
- [19] Pan X, Chen D, Xia Y, Wu X, Li T, Ou X, et al. Asymptomatic cases in a family cluster with SARS-CoV-2 infection. *Lancet Infect Dis.* 2020;20:410-1.
- [20] Tong ZD, Tang A, Li KF, Li P, Wang HL, Yi JP, et al. Potential Presymptomatic Transmission of SARS-CoV-2, Zhejiang Province, China, 2020. *Emerg Infect Dis.* 2020;26:1052-4.
- [21] Gautret P, Lagier JC, Parola P, Hoang VT, Meddeb L, Mailhe M, et al. Hydroxychloroquine and azithromycin as a treatment of COVID-19: results of an open-label non-randomized clinical trial. *Int J Antimicrob Agents.* 2020:105949.
- [22] Su L, Ma X, Yu H, Zhang Z, Bian P, Han Y, et al. The different clinical characteristics of corona virus disease cases between children and their families in China - the character of children with COVID-19. *Emerg Microbes Infect.* 2020;9:707-13.
- [23] Yao P, Tang P, Jiang H, Gu B, Xu P, Wang X, et al. Clusters of Human Severe Acute Respiratory Syndrome Coronavirus 2 (SARS-Cov-2) infection in a non-epidemic area, China. 2020.
- [24] Lan L, Xu D, Xia C, Wang S, Yu M, Xu H. Early CT Findings of Coronavirus Disease 2019 (COVID-19) in Asymptomatic Children: A Single-Center Experience. *Korean J Radiol.* 2020;21:919-24.
- [25] Liu W, Zhang Q, Chen J, Xiang R, Song H, Shu S, et al. Detection of Covid-19 in Children in Early January 2020 in Wuhan, China. *N Engl J Med.* 2020;382:1370-1.
- [26] Sun D, Li H, Lu XX, Xiao H, Ren J, Zhang FR, et al. Clinical features of severe pediatric patients with coronavirus disease 2019 in Wuhan: a single center's observational study. *World J Pediatr.* 2020.
- [27] Ji LN, Chao S, Wang YJ, Li XJ, Mu XD, Lin MG, et al. Clinical features of pediatric patients with COVID-19: a report of two family cluster cases. *World J Pediatr.* 2020.
- [28] Park JY, Han MS, Park KU, Kim JY, Choi EH. First Pediatric Case of Coronavirus Disease 2019 in Korea. *J Korean Med Sci.* 2020;35:e124.

- [29] Cui Y, Tian M, Huang D, Wang X, Huang Y, Fan L, et al. A 55-Day-Old Female Infant Infected With 2019 Novel Coronavirus Disease: Presenting With Pneumonia, Liver Injury, and Heart Damage. *J Infect Dis.* 2020;221:1775-81.
- [30] Spiteri G, Fielding J, Diercke M, Campese C, Enouf V, Gaymard A, et al. First cases of coronavirus disease 2019 (COVID-19) in the WHO European Region, 24 January to 21 February 2020. *Euro Surveill.* 2020;25.
- [31] Liu H, Liu F, Li J, Zhang T, Wang D, Lan W. Clinical and CT imaging features of the COVID-19 pneumonia: Focus on pregnant women and children. *J Infect.* 2020;80:e7-e13.
- [32] Zhang T, Cui X, Zhao X, Wang J, Zheng J, Zheng G, et al. Detectable SARS-CoV-2 viral RNA in feces of three children during recovery period of COVID-19 pneumonia. *J Med Virol.* 2020;92:909-14.
- [33] Le HT, Nguyen LV, Tran DM, Do HT, Tran HT, Le YT, et al. The first infant case of COVID-19 acquired from a secondary transmission in Vietnam. *Lancet Child Adolesc Health.* 2020;4:405-6.
- [34] Lou XX, Shi CX, Zhou CC, Tian YS. Three children who recovered from novel coronavirus 2019 pneumonia. *J Paediatr Child Health.* 2020;56:650-1.
- [35] Li D, Wang D, Dong J, Wang N, Huang H, Xu H, et al. False-Negative Results of Real-Time Reverse-Transcriptase Polymerase Chain Reaction for Severe Acute Respiratory Syndrome Coronavirus 2: Role of Deep-Learning-Based CT Diagnosis and Insights from Two Cases. *Korean J Radiol: Copyright © 2020 The Korean Society of Radiology.*; 2020. p. 505-8.
- [36] Dong X, Cao YY, Lu XX, Zhang JJ, Du H, Yan YQ, et al. Eleven faces of coronavirus disease 2019. *Allergy.* 2020;75:1699-709.
- [37] Cai J, Xu J, Lin D, Yang Z, Xu L, Qu Z, et al. A Case Series of children with 2019 novel coronavirus infection: clinical and epidemiological features. *Clin Infect Dis.* 2020.
- [38] Odievre MH, de Marcellus C, Ducou Le Pointe H, Allali S, Romain AS, Youn J, et al. Dramatic improvement after tocilizumab of severe COVID-19 in a child with sickle cell disease and acute chest syndrome. *Am J Hematol.* 2020.
- [39] Wu P, Liang L, Chen C, Nie S. A child confirmed COVID-19 with only symptoms of conjunctivitis and eyelid dermatitis. *Graefes Arch Clin Exp Ophthalmol.* 2020.
- [40] Dugue R, Cay-Martinez KC, Thakur KT, Garcia JA, Chauhan LV, Williams SH, et al. Neurologic manifestations in an infant with COVID-19. *Neurology.* 2020;94:1100-2.
- [41] Parri N, Lenge M, Buonsenso D, Coronavirus Infection in Pediatric Emergency Departments Research G. Children with Covid-19 in Pediatric Emergency Departments in Italy. *The New England journal of medicine.* 2020;383:187-90.
- [42] Lee H, Mantell BS, Richmond ME, Law SP, Zuckerman WA, Addonizio LJ, et al. Varying presentations of COVID-19 in young heart transplant recipients: A case series. *Pediatr Transplant.* 2020;n/a:e13780.
- [43] Musolino AM, Supino MC, Buonsenso D, Ferro V, Valentini P, Magistrelli A, et al. Lung Ultrasound in Children with COVID-19: Preliminary Findings. *Ultrasound Med Biol.* 2020;46:2094-8.
